# Supplementary material for: The trunk replaces the longer mandible as the main feeding organ in elephant evolution
Source: eLife. 2024 Jun 20;12:RP90908. doi: 10.7554/eLife.90908 (PMC11189625; doi:10.7554/eLife.90908)
Supplement: Figure 1—source data 1. [file elife-90908-fig1-data1.xlsx]

## Sheet: data matrix
				Characters
No.	taxon	beginning age (Ma)	ending age (Ma)	1	2	3	4	5	6	7	8	9	10	11	12	13	14	15	16	17	18	19	20	21	22	23	24	25	26	27	28	29	30	31	32	33	34	35	36	37	38	39	40	41	42	43	44	45	46
1	Phiomia serridens	30	33	0	0	0	0	0	0	0	0	0	0	0	0	0	0	0	0	0	0	0	0	0	0	0	0	0	0	0	0	0	0	0	0	0	0	0	0	0	0	0	0	0	0	0	0	0	0
2	Losodokodon Losodokius	24	27.5	?	?	?	?	?	?	?	?	?	?	?	?	?	?	?	?	?	?	?	1	?	0	0	1	?	0	-	?	?	2	0	0	0	2	2	2	2	?	2	0	0	0	?	0	2	?
3	Eozygodon morotoensis	17.5	23.5	0	0	0	0	0	0	0	0	2	0	2	1	0	0	1	0	1	0	0	1	?	0	0	1	1	0	0	0	0	2	0	0	0	2	2	2	2	1	2	0	0	0	1	0	2	2
4	Zygolophodon turicensis	9.5	20	0	0	0	0	0	0	1	1	2	0	3	1	0	1	1	0	1	0	0	1	?	0	0	2	1	0	0	0	0	2	0	0	0	2	2	2	2	1	2	0	0	0	1	0	2	2
5	Eritreum melakeghebrekristosi	26.8	26.8	?	?	?	?	?	0	0	0	2	?	2	1	?	?	?	?	?	?	?	1	?	0	0	?	1	?	?	0	0	0	0	0	0	?	0	0	0	0	0	0	0	1	0	0	?	0
6	Gomphotherium annectens	18	19	?	?	?	?	?	0	0	0	2	0	2	1	0	1	?	?	?	?	?	1	?	0	0	1	2	0	0	0	0	0	0	0	0	0	0	0	0	0	0	0	0	1	0	0	0	0
7	Gomphotherium sylcaticum	17	18	0	0	0	0	0	0	?	?	?	?	?	?	?	?	?	?	?	?	?	1	?	0	0	2	2	1	0	1	0	1	0	0	0	1	0	0	0	0	1	0	0	1	0	0	0	1
8	Gomphotherium angustidens	12	17	0	0	1	0	0	0	0	0	2	0	2	1	0	1	1	0	1	1	1	1	2	0	0	3	3	1	1	1	1	0	1	0	0	1	0	0	1	0	1	0	0	1	0	0	0	0
9	Gomphotherium steinheimense	11.6	18	0	0	0	0	0	0	1	0	2	0	2	1	0	1	?	?	?	?	?	1	2	0	0	4	3	1	0	1	0	0	0	0	0	1	0	0	0	0	3	0	0	0	0	0	0	0
10	Gomphotherium inopinatum	16	19.5	0	0	0	0	0	0	0	0	2	0	2	1	0	?	?	?	?	?	?	1	?	0	0	2	2	1	0	1	0	1	0	0	0	1	0	0	1	0	1	0	0	1	0	0	1	1
11	Gomphotherium tassyi	12	16	0	0	0	0	0	0	0	0	2	0	2	1	0	0	?	?	?	?	?	1	?	0	0	2	2	1	0	1	0	1	0	0	0	1	1	1	1	0	1	0	0	1	0	0	1	1
12	Gomphotherium browni	11.2	14.2	0	0	0	0	0	0	0	0	2	0	3	1	0	1	?	?	?	?	?	1	2	0	0	3	?	1	0	0	0	1	0	1	0	1	1	1	1	0	1	0	0	1	0	0	0	0
13	Gomphotherium productum	4.5	15.8	0	0	0	0	0	0	0	0	2	0	3	1	0	1	1	0	1	1	1	1	2	0	0	2	2	1	0	1	0	1	0	0	0	1	1	1	0	0	1	0	0	1	0	0	1	1
14	Rhynchotherium tlascalae	1.8	8.8	0	0	0	0	0	0	0	0	2	1	3	1	0	0	1	0	1	1	1	1	?	0	0	2	2	1	0	1	0	1	0	0	0	1	1	1	0	0	1	0	0	1	0	0	1	1
15	Archaeobelodon filholi	13.5	20	0	0	0	0	0	0	0	0	0	0	0	0	0	1	1	0	1	1	1	1	2	0	0	2	2	1	0	1	0	0	1	0	0	1	0	0	0	0	1	0	0	1	0	0	1	1
16	Protanancus brevirostris	18	19.5	0	0	1	0	0	0	0	0	0	0	0	0	0	1	?	?	?	?	?	1	2	0	0	2	2	1	0	1	0	0	0	0	1	1	0	0	0	0	1	1	0	1	0	0	1	1
17	Protanancus wimani	18	14.5	0	0	1	0	0	0	0	0	0	0	0	0	0	1	?	?	?	?	?	1	2	0	0	3	2	1	0	1	0	0	0	0	1	1	0	0	0	0	1	1	0	1	0	0	1	0
18	Protanancus macinnesi	11.4	18	?	?	?	?	?	0	0	0	0	0	0	0	0	?	1	0	1	1	1	1	2	0	0	3	2	1	0	1	0	0	0	0	1	1	0	0	0	0	1	1	0	1	0	1	0	0
19	Protanancus chinjiensis	11.2	14.2	?	?	?	?	?	0	0	0	0	0	0	0	0	?	1	0	1	1	1	1	?	0	0	3	3	1	0	1	1	0	0	0	1	1	0	0	0	0	1	1	0	1	0	1	0	0
20	Platybelodon danovi	15	17.5	1	1	0	1	1	0	0	0	1	0	1	0	1	1	1	0	1	1	1	1	2	0	0	3	3	1	0	1	1	0	0	0	1	1	1	0	0	0	1	1	1	1	0	1	1	1
21	Platybelodon grangeri	13.5	15	0	1	0	1	1	0	0	0	1	0	1	0	1	1	1	0	1	1	1	1	3	0	0	4	4	1	0	1	1	0	0	0	1	1	1	0	0	0	1	1	1	1	0	1	1	1
22	Platybelodon barnumbrowni	7.5	12.5	?	?	?	?	?	0	1	1	1	0	1	0	?	1	?	?	?	?	?	1	?	0	0	?	2	?	?	1	0	0	0	0	1	?	0	0	0	0	1	1	?	1	0	1	?	1
23	Aphanobelodon zhaoi	14	15	2	-	-	-	-	0	0	0	1	0	1	0	0	1	?	?	?	?	?	1	?	0	0	3	3	1	0	1	1	0	0	0	1	1	1	0	0	0	1	1	1	1	0	1	1	1
24	Serbelodon barbourensis	7.5	12.5	0	0	0	0	0	0	0	0	0	0	0	0	0	1	?	?	?	?	?	1	?	0	0	2	2	1	0	1	0	0	0	0	0	1	1	0	0	0	1	0	0	1	0	0	1	1
25	Amebelodon fricki	7.2	8.6	0	0	0	0	0	0	0	0	0	0	0	0	0	0	?	?	?	?	?	1	?	0	0	4	3	1	0	1	0	0	0	0	1	1	0	0	0	0	1	2	1	1	0	1	0	0
26	Torynobelodon britti	5	7.5	0	0	0	0	0	0	0	0	0	0	0	0	1	0	?	?	?	?	?	1	?	1	1	4	4	1	0	1	0	0	0	0	1	1	0	0	0	0	1	2	1	1	0	1	0	0
27	Megabelodon lulli	7.5	12.5	0	0	0	0	0	1	-	-	-	-	-	-	-	-	1	0	1	1	1	1	?	0	0	3	2	1	0	1	0	0	0	0	1	1	0	1	0	0	1	2	0	1	0	0	0	0
28	Eubelodon morrilli	7.5	12.5	0	0	0	0	0	1	-	-	-	-	-	-	-	-	?	?	?	?	?	1	?	0	0	3	2	1	0	1	0	0	0	0	1	1	0	1	0	0	1	2	0	1	0	0	0	0
29	Choerolophodon guangheensis	18	19.5	3	2	2	2	1	1	-	-	-	-	-	-	-	-	?	?	?	?	?	1	1	0	0	1	2	1	0	1	0	0	0	0	1	1	0	0	0	0	1	0	1	1	0	0	0	0
30	Choerolophodon chioticus	15	16	3	2	2	2	1	1	-	-	-	-	-	-	-	-	?	?	?	?	?	1	1	0	0	2	2	1	0	1	0	0	0	0	0	1	0	0	0	0	1	0	1	0	0	0	0	0
31	Choerolophodon connexus	16	18	3	2	2	2	1	1	-	-	-	-	-	-	-	-	?	?	?	?	?	1	1	0	0	3	2	1	1	1	1	0	0	0	0	0	0	0	0	0	1	0	1	0	0	0	0	0
32	Gnathabelodon throperi	9.5	11	3	2	2	2	1	1	-	-	-	-	-	-	-	-	?	?	?	?	?	1	?	0	0	3	2	1	0	1	0	0	0	0	1	1	0	0	0	0	1	1	1	0	0	0	0	0
33	Afrochoerodon kisumuensis	15	16	3	2	2	2	1	1	-	-	-	-	-	-	-	-	?	?	?	?	?	1	?	0	0	2	2	0	0	1	0	0	0	1	1	1	0	0	0	0	0	0	1	1	0	1	0	0
34	Choerolophodon ngrora	9.5	14	3	2	2	2	1	1	-	-	-	-	-	-	-	-	1	1	0	1	0	1	3	0	0	3	2	0	0	1	0	0	0	1	1	1	0	0	0	0	0	0	1	1	0	1	0	0
35	Choerolophodon corrugatus	6.5	13.5	3	2	2	2	1	1	-	-	-	-	-	-	-	-	1	1	1	1	0	1	3	0	0	3	3	0	0	1	0	0	0	1	1	1	0	0	0	0	0	0	1	1	0	1	0	0
36	Choerolophodon pentlici	5.2	9.6	3	2	2	2	1	1	-	-	-	-	-	-	-	-	1	1	1	1	1	1	3	0	0	3	2	0	0	1	0	0	0	1	0	1	0	0	0	0	0	0	1	1	0	1	0	0
37	Tetralophodon longirostris	8	12	0	1	0	0	1	0	0	0	2	0	3	1	0	1	1	2	1	0	0	2	2	1	1	4	3	1	0	1	0	0	0	1	0	1	0	0	0	0	3	0	0	0	0	0	0	3
[truncated: 34 more columns]
