# Supplementary material for: The trunk replaces the longer mandible as the main feeding organ in elephant evolution
Source: eLife. 2024 Jun 20;12:RP90908. doi: 10.7554/eLife.90908 (PMC11189625; doi:10.7554/eLife.90908)
Supplement: Supplementary file 1. — 2 Geometric and mesh parameters of the finite element (FE) models. 3 Material properties in the finite element (FE) models. 4 Muscle forces estimation of finite element (FE) models. [file elife-90908-supp1.xlsx]

## Sheet: Table 1-age
Table 1. Age estimation of different faunas of the four region, dating after Sun 2014, Wang, 2021, Wang et al., 2022, and Qiu et al., 2013 .
	region	locality	beginning age (Ma)	ending age (Ma)	average age (Ma)	references
	Linxia Basin	Dalanggou (LX1)	19	18	18.5	Sun 2014, reinterpreted
	Linxia Basin	Shinanu (LX2)	17	15.2	16.1	Sun 2014, reinterpreted
	Linxia Basin	Zengjia (LX3)	14.5	14	14.25	Sun 2014, reinterpreted
	Linxia Basin	Laogou (LX4)	14	12.5	13.25	Sun 2014, reinterpreted
	Tongxin Region	Lower Miaoerling (TX1)	17.8	17	17.4	Wang 2021, reinterpreted
	Tongxin Region	Middle Miaoerling (TX2)	16.6	16	16.3	Wang 2021, reinterpreted
	Tongxin Region	Upper Miaoerling (TX3)	14.5	13.5	14	Wang 2021, reinterpreted
	Tongxin Region	Heijiagou (TX4)	13.4	12.7	13.05	estimated, based on Wang 2021*
	Junggar Basin	Top Suosuoquan (JG1)	18.8	18.4	18.6	Wang et al., 2022
	Junggar Basin	Halamagai (JG2)	16.9	15	15.95	Wang et al., 2022
	Junggar Basin	Kekemaideng (JG3)	14.5	14	14.25	Wang et al., 2022
	Junggar Basin	Dingshanyanchi I (JG4)	13	12.6	12.8	Wang et al., 2022
	Tunggur region	Tairum (TG1)	13.6	13.2	13.4	Qiu et al., 2013
	Tunggur region	Moergen (TG2)	13.2	12	12.6	Qiu et al., 2013
	Tunggur region	Tamuqin (TG3)	12	11.6	11.8	Qiu et al., 2013
	*Hejiagou is located at Zhongning county, the strata is correlated to the upper part of the Zhangenbao Formation, the same as that in Tongxin region.

## Sheet: Table 2-FE
Table 2. Geometric and mesh parameters of the FE models.
	Models	element type	element number	volume (mm3)	scale factor (%)
	Choerolophodon, cranium	C3D4	306068	2.77632e+07	1
	Choerolophodon, mandible	C3D4	128982	6.56371e+06	1
	Choerolophodon, keratinous sheet	C3D4	27648	80054.1	1
	Platybelodon, cranium	C3D4	96734	1.5568e+07	84.23
	Platybelodon, mandible	C3D4	110010	6.5637e+06	84.23
	Platybelodon, mandibular tusk	C3D4	30416	1.25571e+06	84.23
	Gomphotherium, cranium	C3D4	42666	2.84413e+07	99.11
	Gomphotherium, mandible	C3D4	92780	6.56371e+06	99.11
	Gomphotherium, mandibular tusk	C3D4	18564	438421	99.11
	twig	C3D8R	106650	589049	―

## Sheet: Table 3-FE
Table 3. Material properties in the FE models, after Drake et al., 2016, Huo et al., 2000, and Forest Products Laboratory • United States Department of Agriculture Forest Service
		Elasticity parameters
	Materials	Young's modulus (MPa)	Poisson's ratio
	bone	15000	0.28
	dentine (tusk)	29500	0.44
	horny integument (keratin)	2000	0.3
	wood (wet red pine) subscript: L: axial; R: radial; T, tangential	Erthotropic elastoplasticity parameters
	direct modulus (MPa)	EL	ER	ET
		9680	425.92	851.84
	shearing modulus (MPa)	GLR	GLT	GRT
		929.28	784.08	106.48
	Poisson's ratio	mLR	mLT	mRT
		0.347	0.315	0.408
	yield stress (MPa)	f0
		18.8
	yield ratio	RLL	RRR	RTT
		1	0.0957	0.0957
		RLT	RRT	RLR
		0.4422	0.4422	0.4422

## Sheet: Table 4-FE
Table 4. Muscle forces estimation of FE models
		At, temporal fossa area (mm2)	AA, masseter attaching area (mm2)	force on each axial connector of the temporalis (N)	force on each axial connector of the masseter-complex (N)	external force (N)
	Choerolophodon	103333	49608.1	3099.98	1488.24	5000
	Platybelodon*	35435.5	51968.1	3099.98	1488.24	5000
	Gomphotherium*	89298.5	56203.2	3099.98	1488.24	5000
	*scaled to the same volume as Choerolophodon, and the uniform muscle forces estimated from Choerolophodon model were used, see the context
